# Supplementary material for: Molecular Epidemiology of Colonizing and Infecting Isolates of Klebsiella pneumoniae
Source: PubMed Central journal article supplement (PMC5071533; doi:10.1128/msphere.00261-16), 2016-10-19

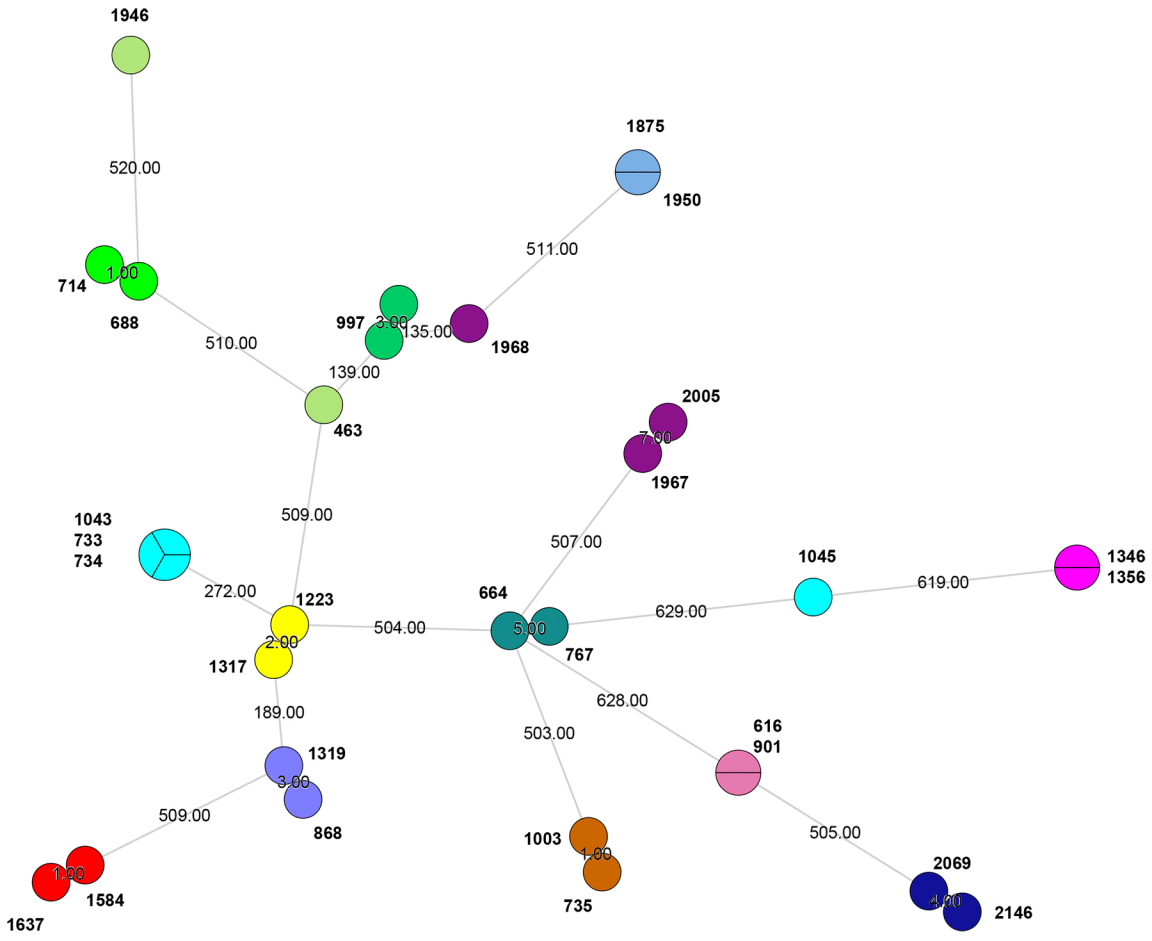

Supplement: sph005162166sf4.pdf [file sph005162166sf4.pdf]
